# Supplementary material for: An advanced hybrid supercapacitor constructed from rugby-ball-like NiCo2Se4 yolk–shell nanostructures
Source: Royal Society of Chemistry journal article supplement (doi:10.1039/d1qm00349f), 2021-01-01
Supplement: d1qm00349f1.pdf [file d1qm00349f1.pdf]

## Supporting Information

### An advanced hybrid supercapacitor constructed from rugby-ball-like $\text{NiCo}_2\text{Se}_4$ yolk-shell nanostructures

Bahareh Ameri, Akbar Mohammadi Zardkhoshoui and Saied Saeed Hosseiny Davarani\*  
Department of Chemistry, Shahid Beheshti University, G. C., 1983963113, Evin, Tehran, Iran.  
Corresponding author: \*Tel: +98 21 22431661; Fax: +98 21 22431661; E-mail: [ss-hosseiny@sbu.ac.ir](mailto:ss-hosseiny@sbu.ac.ir) (S.S.H. Davarani)

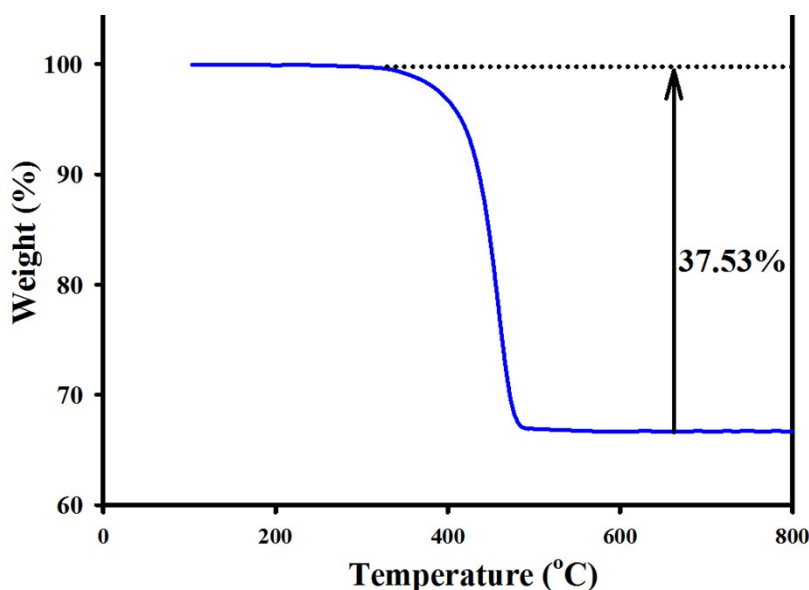

**Fig S1.** Thermal gravimetric analysis (TGA) of the  $\text{NiCO}_3@CoCO_3$  precursor with the temperature ramp of 5 °C/min under air flow.

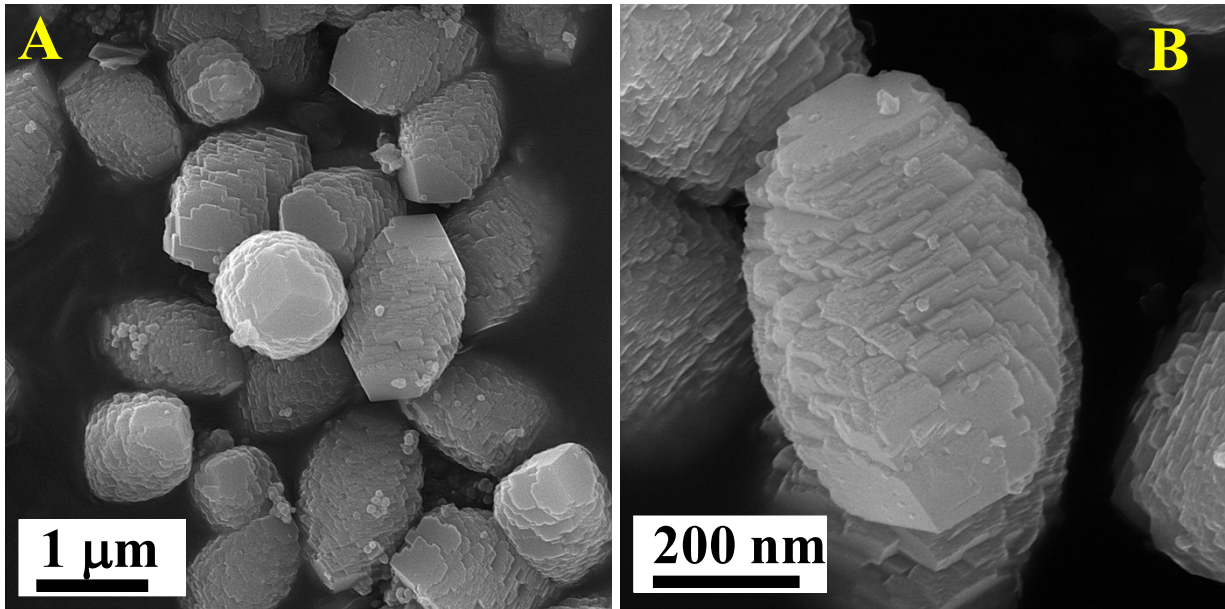

Fig S2. (A and B) FE-SEM images of the  $\text{NiCO}_3@\text{CoCO}_3$  sample.

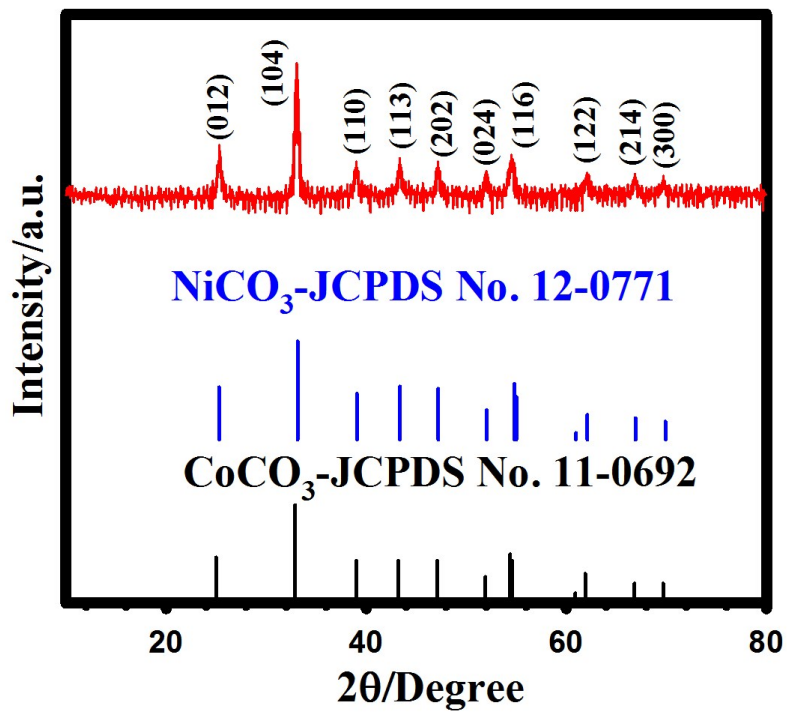

Fig S3. XRD pattern of the  $\text{NiCO}_3@\text{CoCO}_3$  sample.

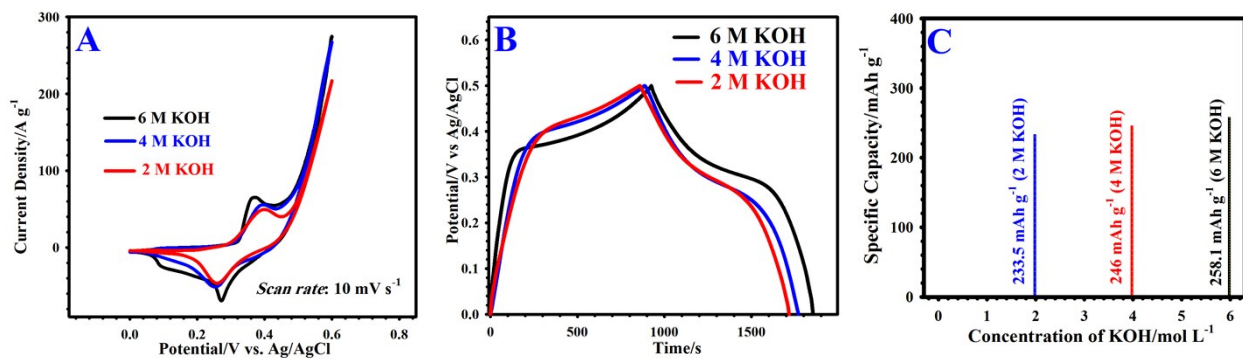

**Fig S4.** (A) CV profiles of the RB-NCS electrode at 10 mV/s in several concentration of KOH electrolyte. (B) GCD plots of the RB-NCS electrode at 1 A/g in various concentration of KOH electrolyte. (C) The specific capacity values of the RB-NCS electrode in several concentration of KOH electrolyte at 1 A/g.

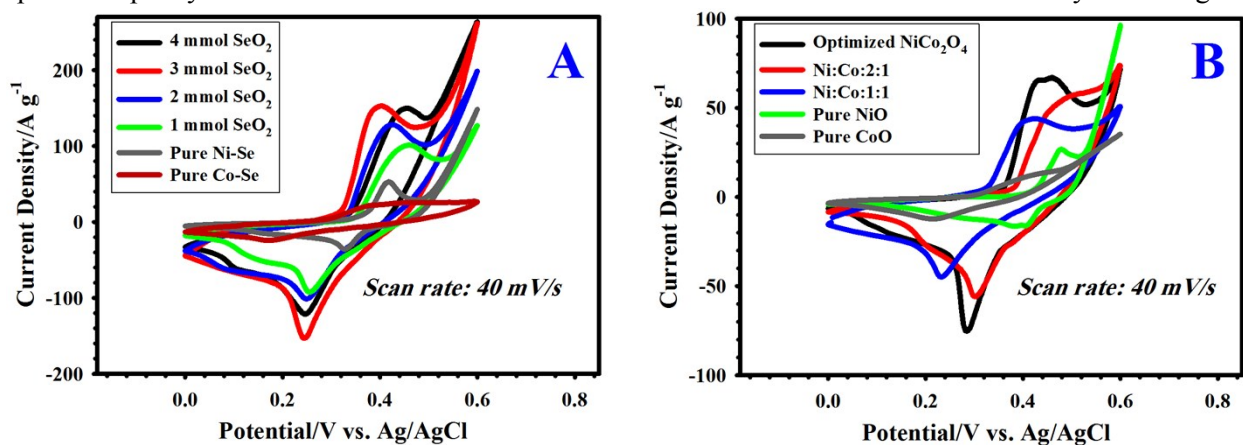

**Fig S5.** (A) CV curves of the Ni-Co-selenide electrodes at 40 mV/s. (B) CV curves of the Ni-Co-oxide electrodes at 40 mV/s.

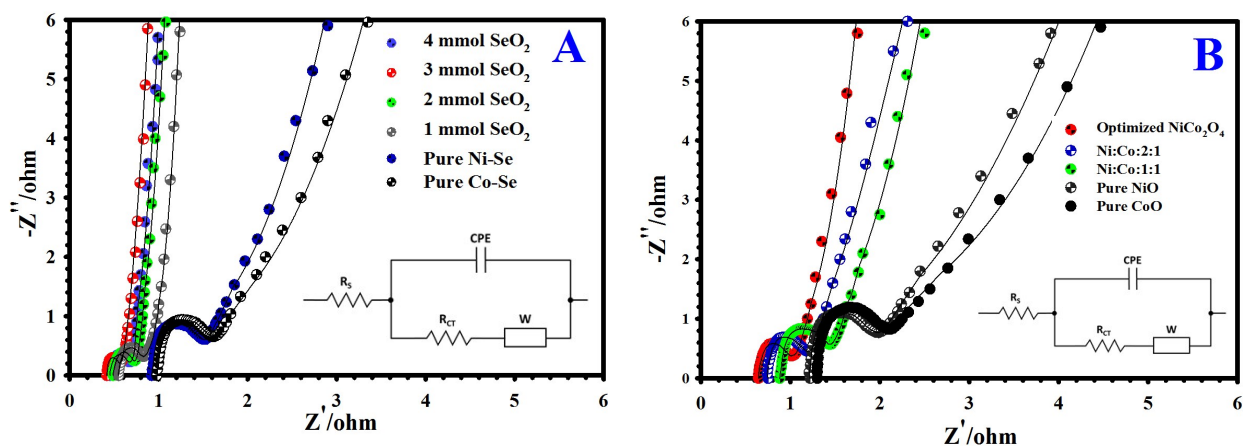

**Fig S6.** (A) EIS plots of the Ni-Co-selenide electrodes. (B) EIS plots of the Ni-Co-oxide electrodes.

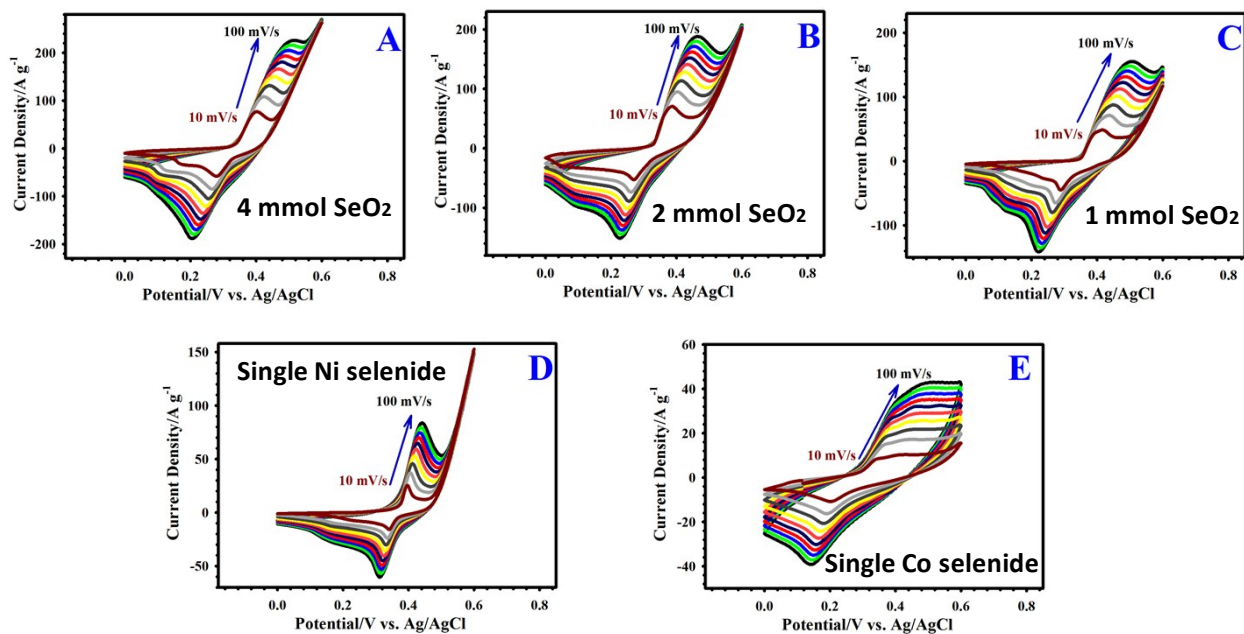

Fig S7. (A-E) CV curves of the Ni-Co-selenide electrodes at various scan rates.

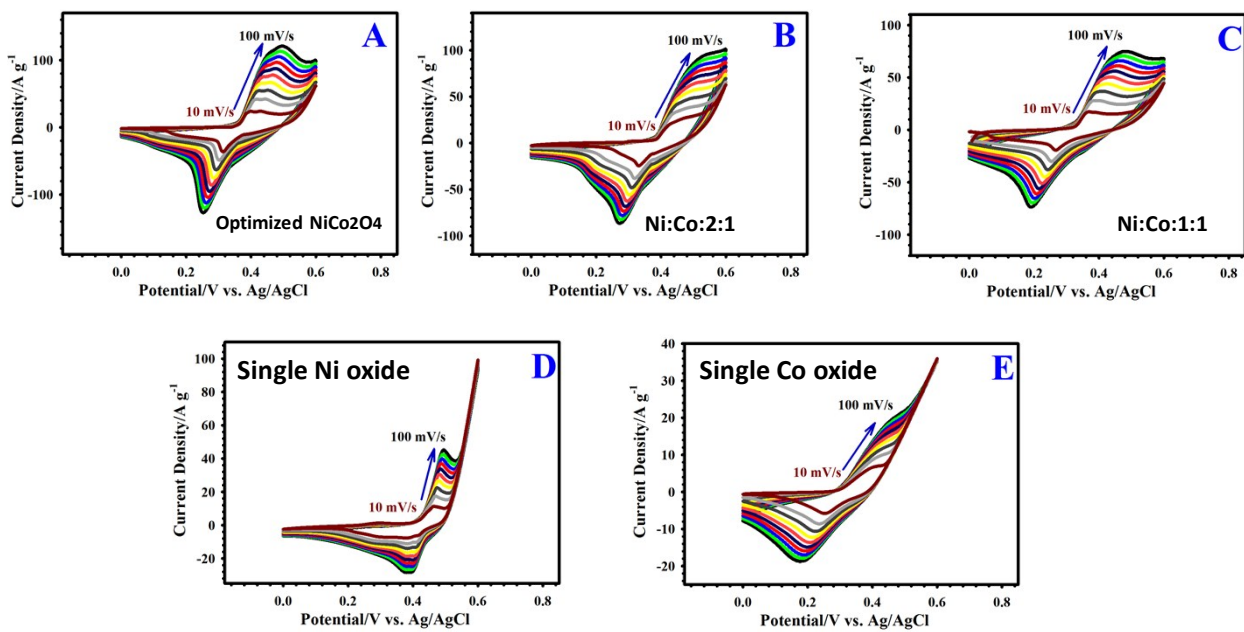

Fig S8. (A-E) CV curves of the Ni-Co-oxide electrodes at various scan rates.

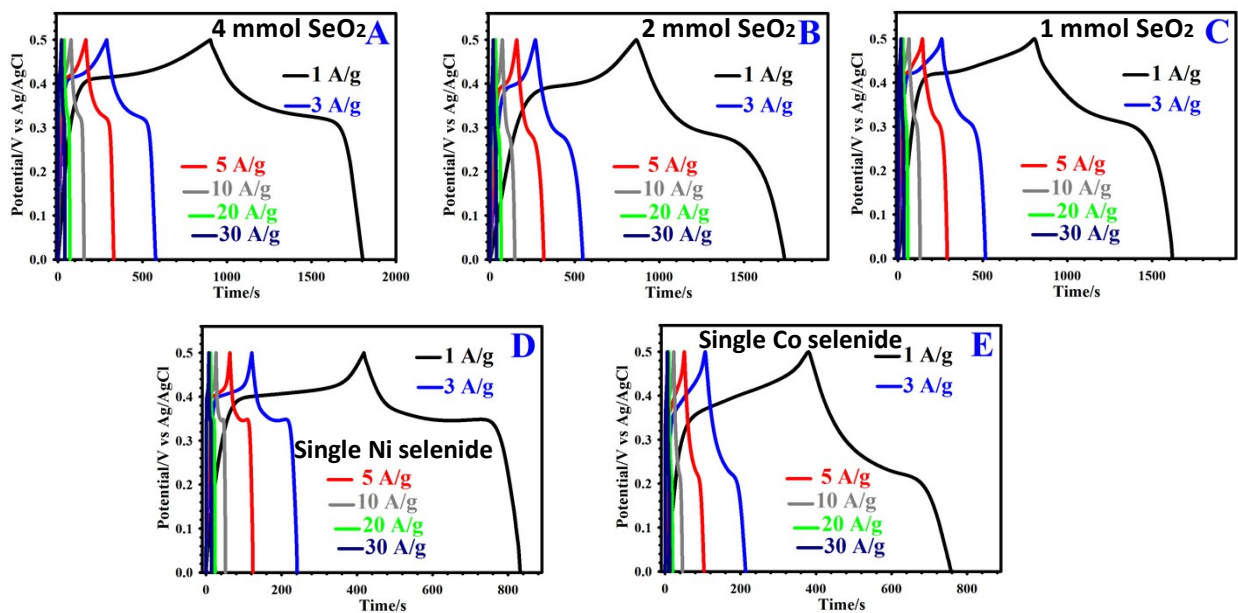

Fig S9. (A-E) GCD curves of the Ni-Co-selenide electrodes at various current densities.

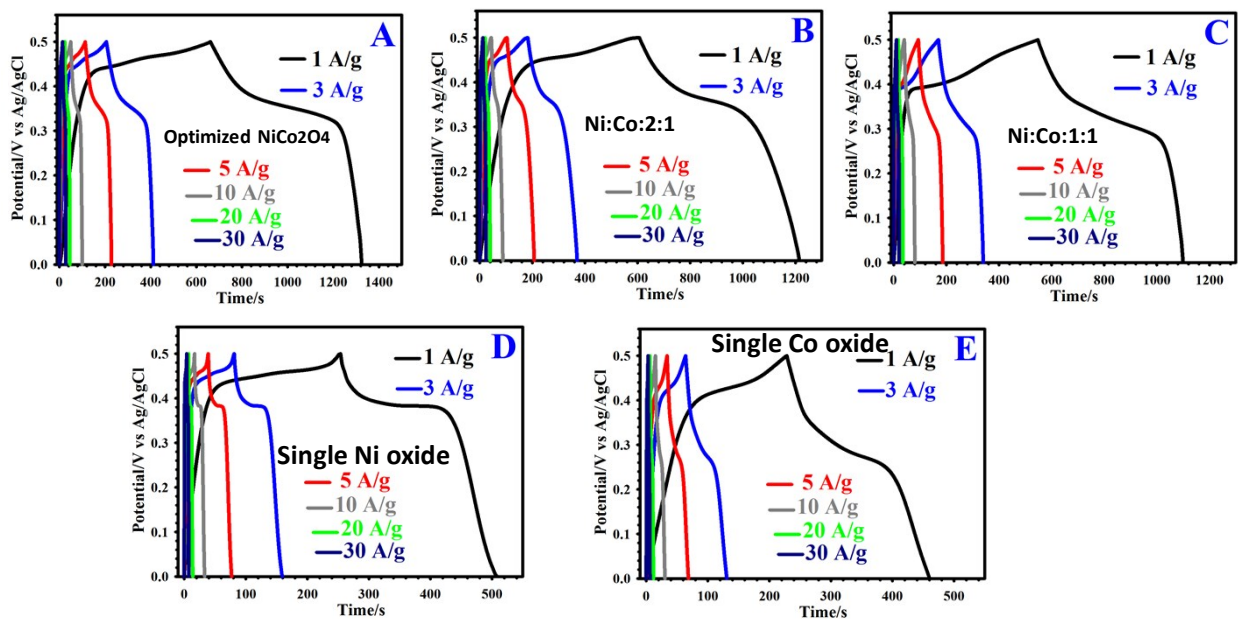

Fig S10. (A-E) GCD curves of the Ni-Co-oxide electrodes at various current densities.

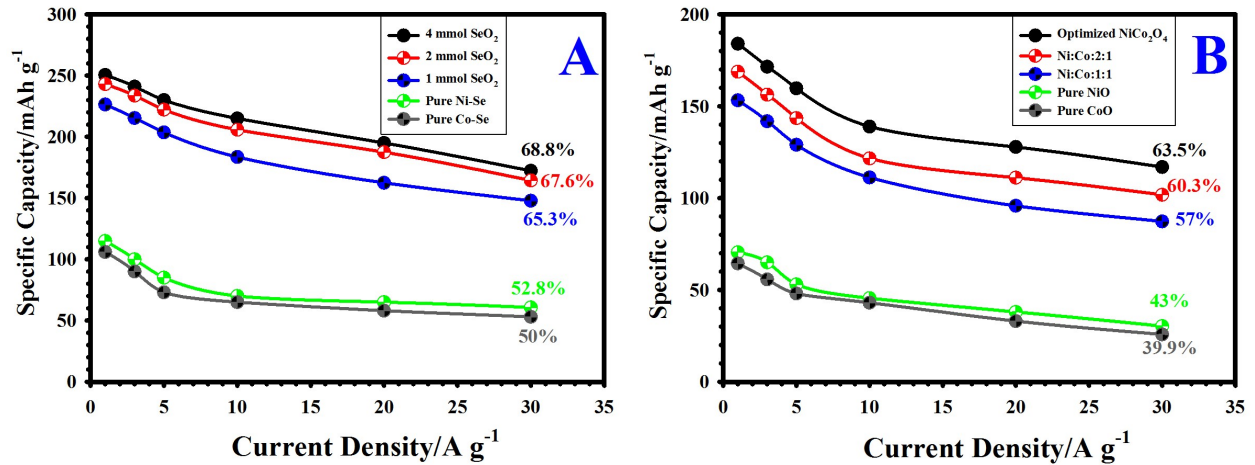

**Fig S11.** (A) Rate capability of the Ni-Co-selenide electrodes. (B) Rate capability of the Ni-Co-oxide electrodes.

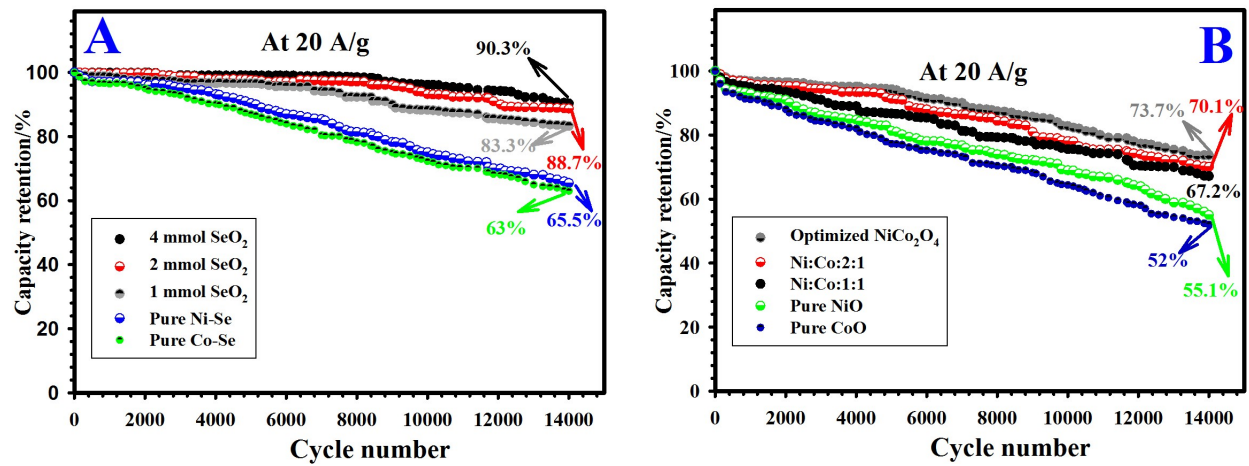

**Fig S12.** (A) Cyclic performance of the Ni-Co-selenide electrodes. (B) Cyclic performance of the Ni-Co-oxide electrodes.

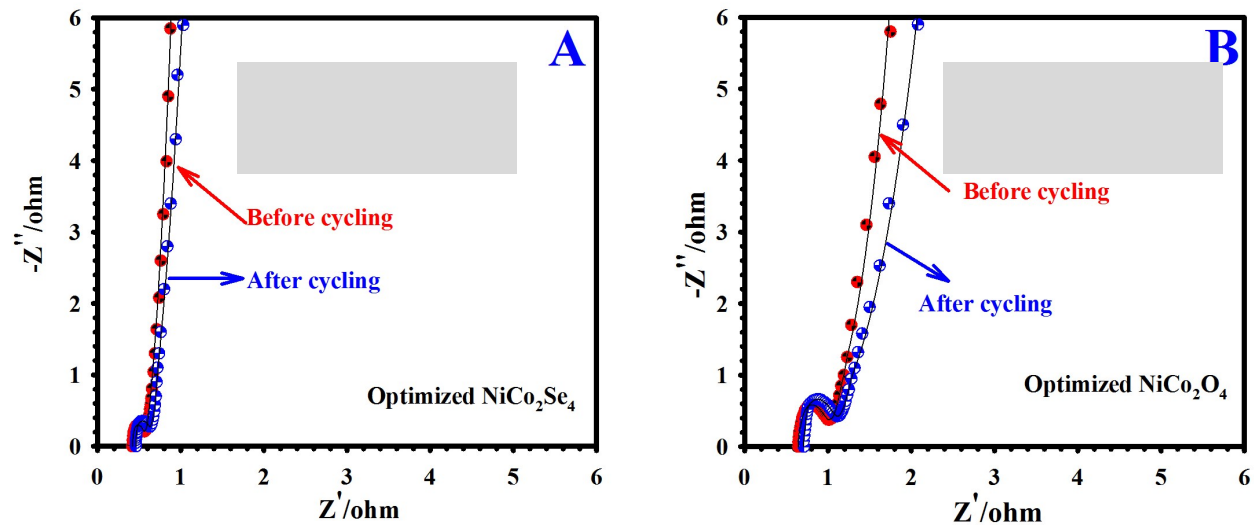

**Fig S13.** (A) EIS plots of the RB-NCS electrode before and after longevity test. (B) EIS plots of the RB-NCO electrode before and after longevity test.

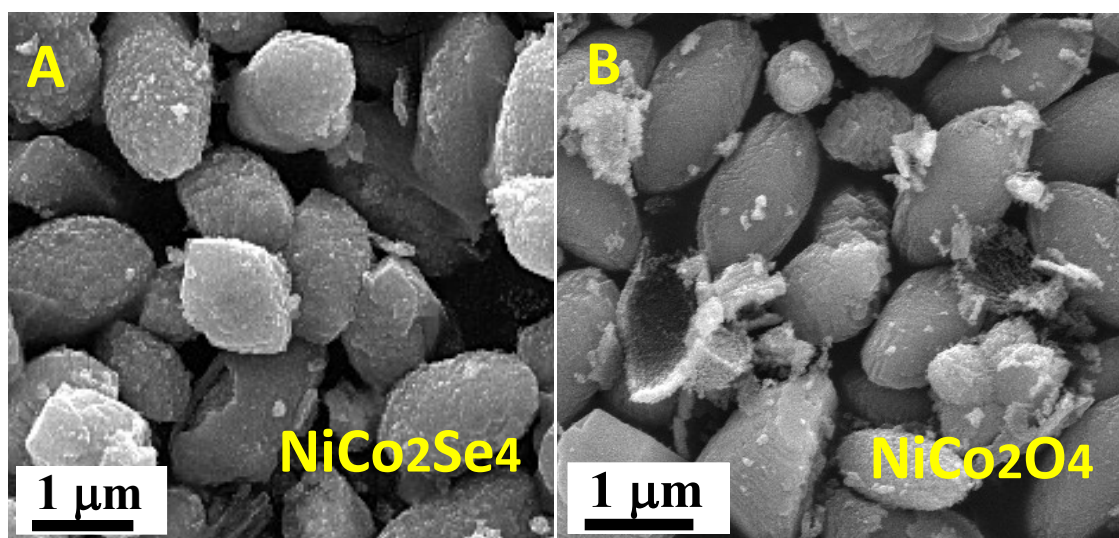

**Fig S14.** (A) FE-SEM image of the RB-NCS sample after longevity test. (B) FE-SEM image of the RB-NCO sample after longevity test.

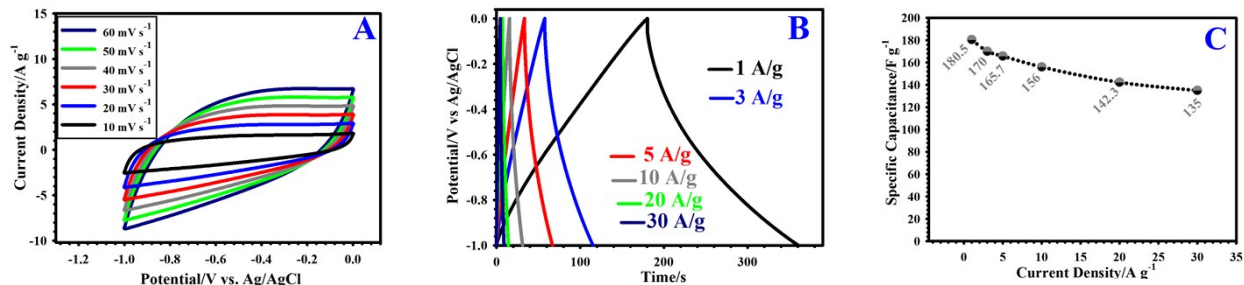

**Fig S15.** (A) CV curves of the AC-based electrode at various sweep speeds of 10-60 mV/s. (B) GCD curves of the AC-based electrode at various current densities of 1-30 A/g. (C) Specific capacity vs. current density of AC-based electrode.

**Table S1.** Comparison of the electrochemical performance of the RB-NCS-based electrode in three electrode systems with other previously reported electrodes.

| Composition                                                 | Capacity (mAh g <sup>-1</sup> )                   | Cycles, retention | Rate capability               | Reference |
|-------------------------------------------------------------|---------------------------------------------------|-------------------|-------------------------------|-----------|
| CoSe <sub>2</sub> /NC                                       | 120.2 mAh g <sup>-1</sup> at 1 A g <sup>-1</sup>  | 10000, 92% (3 E)  | 61.2% at 20 A g <sup>-1</sup> | 1         |
| (Ni, Co)Se <sub>2</sub>                                     | 106 mAh g <sup>-1</sup> at 1 A g <sup>-1</sup>    | 5000, 78%         | 75% at 10 A g <sup>-1</sup>   | 2         |
| Ni <sub>1-x</sub> Co <sub>x</sub> Se <sub>2</sub> /NiCo-LDH | 170 mAh g <sup>-1</sup> at 1 A g <sup>-1</sup>    | 3000, 89%         | 71% at 20 A g <sup>-1</sup>   | 3         |
| NiCoSe-4                                                    | 211 mAh g <sup>-1</sup> at 1 A g <sup>-1</sup>    | 5000, 90.31%      | 71.7% at 20 A g <sup>-1</sup> | 4         |
| CoSe <sub>2</sub> /MoSe <sub>2</sub> -3-1                   | 211.97 mAh g <sup>-1</sup> at 1 A g <sup>-1</sup> | 2000, 94.2%       | 67.8% at 30 A g <sup>-1</sup> | 5         |
| (GNR)/Co <sub>0.85</sub> Se                                 | 76.4 mAh/g at 1 A g <sup>-1</sup>                 | 5000, 89%         | 73% at 10 A g <sup>-1</sup>   | 6         |
| Ni <sub>1/2</sub> Co <sub>1/2</sub> Se <sub>2</sub>         | 166.1 mAh g <sup>-1</sup> at 1 A g <sup>-1</sup>  | 6000, 91.2%       | 75.1% at 20 A g <sup>-1</sup> | 7         |
| Ni <sub>0.85</sub> Se                                       | 114.6 mAh g <sup>-1</sup> at 1 A g <sup>-1</sup>  | 5000, 73.9%       | 60.5% at 10 A g <sup>-1</sup> | 8         |
| (Ni, Co)Se <sub>2</sub>                                     | 106 mAh g <sup>-1</sup> at 2 A g <sup>-1</sup>    | 5000, 90.5%       | 75% at 10 A g <sup>-1</sup>   | 9         |
| RB-NCS electrode                                            | 258.1 mAh g <sup>-1</sup> at 1 A g <sup>-1</sup>  | 14000, 92.2%      | 70.6% at 30 A g <sup>-1</sup> | This work |



## References

- 1 C. Miao, X. Xiao, Y. Gong, K. Zhu, K. Cheng, K. Ye, J. Yan, D. Cao, G. Wang and P. Xu, Facile Synthesis of Metal–Organic Framework-Derived CoSe<sub>2</sub> Nanoparticles Embedded in the N-Doped Carbon Nanosheet Array and Application for Supercapacitors, *ACS Appl. Mater. Interfaces* 2020, **12**, 9365-9375.
- 2 H. Lei, J. Zhou, R. Zhao, H. Peng, Y. Xu, F. Wang, H. A. Hamouda, W. Zhang and G. Ma, Design and assembly of a novel asymmetric supercapacitor based on all-metal selenides electrodes, *Electrochim. Acta* 2020, **363**, 137206.
- 3 X. Li, H. Wu, C. Guan, A. M. Elshahawy, Y. Dong, S. J. Pennycook and J. Wang, (Ni,Co)Se<sub>2</sub>/NiCo-LDH Core/Shell Structural Electrode with the Cactus-Like (Ni,Co)Se<sub>2</sub> Core for Asymmetric Supercapacitors, *Small* 2019, **15**, 1803895.
- 4 H. Liu, H. Guo, N. Wu, W. Yao, R. Xue, M. Wang and W. Yang, Rational design of nickel-cobalt selenides derived from multivariate bimetal metalorganic frameworks for high-performance asymmetric supercapacitor, *J. Alloys Compd.* 2021, **856**, 156535.
- 5 F. Ma, J. Lu, L. Pu, W. Wang and Y. Dai, Construction of hierarchical cobalt-molybdenum selenide hollow nanospheres architectures for high performance battery-supercapacitor hybrid devices, *J. Colloid Interface Sci.* 2020, **563**, 435-446.
- 6 Z. Chen, Y. Yang, Z. Ma, T. Zhu, L. Liu, J. Zheng and X. Gong, All-Solid-State Asymmetric Supercapacitors with Metal Selenides Electrodes and Ionic Conductive Composites Electrolytes, *Adv. Funct. Mater.* 2019, **29**, 1904182.
- 7 C. Miao, G. Xia, K. Zhu, K. Ye, Q. Wang, J. Yan, D. Cao, F. Gong and G. Wang, Enhanced supercapacitor performance of bimetallic metal selenides via controllable synergistic engineering of composition, *Electrochim. Acta* 2021, **370**, 137802.

8 S. Wu, Q. Hu, L. Wu, J. Li, H. Peng and Q. Yang, One-step solvothermal synthesis of nickel selenide nanoparticles as the electrode for high-performance supercapacitors, *J. Alloys Compd.* 2019, **784**, 347–353.

9 H. Lei, J. Zhou, R. Zhao, H. Peng, Y. Xu, F. Wang, H. A. Hamouda, W. Zhang and G. Ma, Design and assembly of a novel asymmetric supercapacitor based on all-metal selenides electrodes, *Electrochim. Acta* 2021, **363**, 137206.
